# Supplementary material
Source: publisher figshare collection journal article supplement (https://acs.figshare.com/ndownloader/files/23728949)
Supplement: Supplementary file 1 [file 23728949]

# Utilizing Photoionization Efficiency Spectroscopy and Density Functional Theory to Investigate Charge Transfer Interactions in $\text{AuCe}_3\text{O}_n$ Clusters

Robert A. Hardy, Aidan M. Karayilan and Gregory F. Metha\*

*Department of Chemistry, The University of Adelaide, South Australia 5005, Australia*

## Supporting Information

This document contains the following supporting information figures:

Figure S1 and S2: Photoionization mass spectra for  $\text{AuCe}_m\text{O}_n$  and  $\text{Ce}_m\text{O}_n$  clusters, respectively.

Figures S3-S14: PIE spectra and DFT-calculated structures for  $\text{Ce}_3\text{O}_n$  and  $\text{AuCe}_3\text{O}_n$  clusters.

Figure S15: Calculated Au, O and  $\text{CeO}_2$  bonding energies for  $\text{Ce}_3\text{O}_n$  and  $\text{AuCe}_3\text{O}_n$  clusters.

Figures S16-S29: Calculated neutral and cationic  $\text{Ce}_3\text{O}_n$  and  $\text{AuCe}_3\text{O}_n$  geometries showing bond lengths and structure point groups.

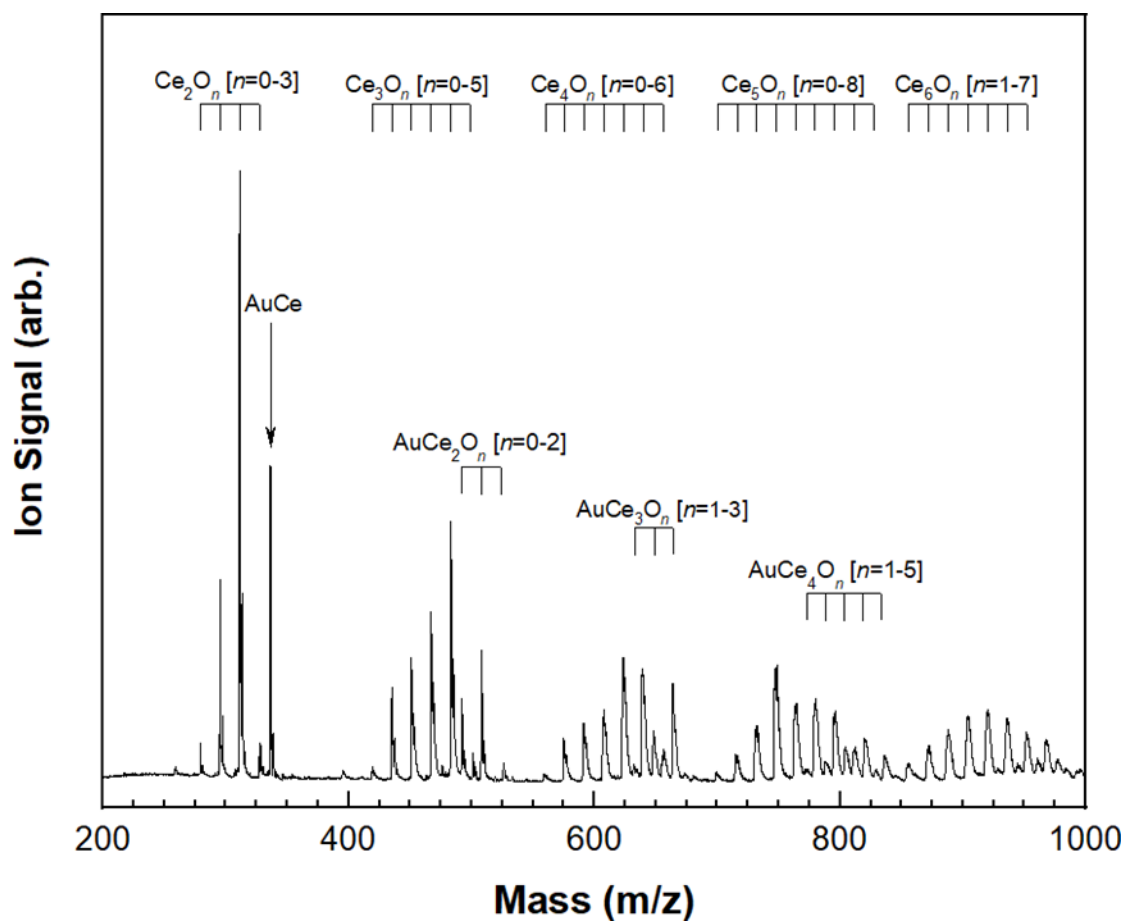

**Figure S1:** Typical mass spectrum of  $\text{AuCe}_m\text{O}_n^+$  clusters recorded following photoionization at 213 nm (5.82 eV). The  $\text{AuCe}_m\text{O}_n$  and  $\text{Ce}_m\text{O}_n$  ion peaks are labelled with ladders.

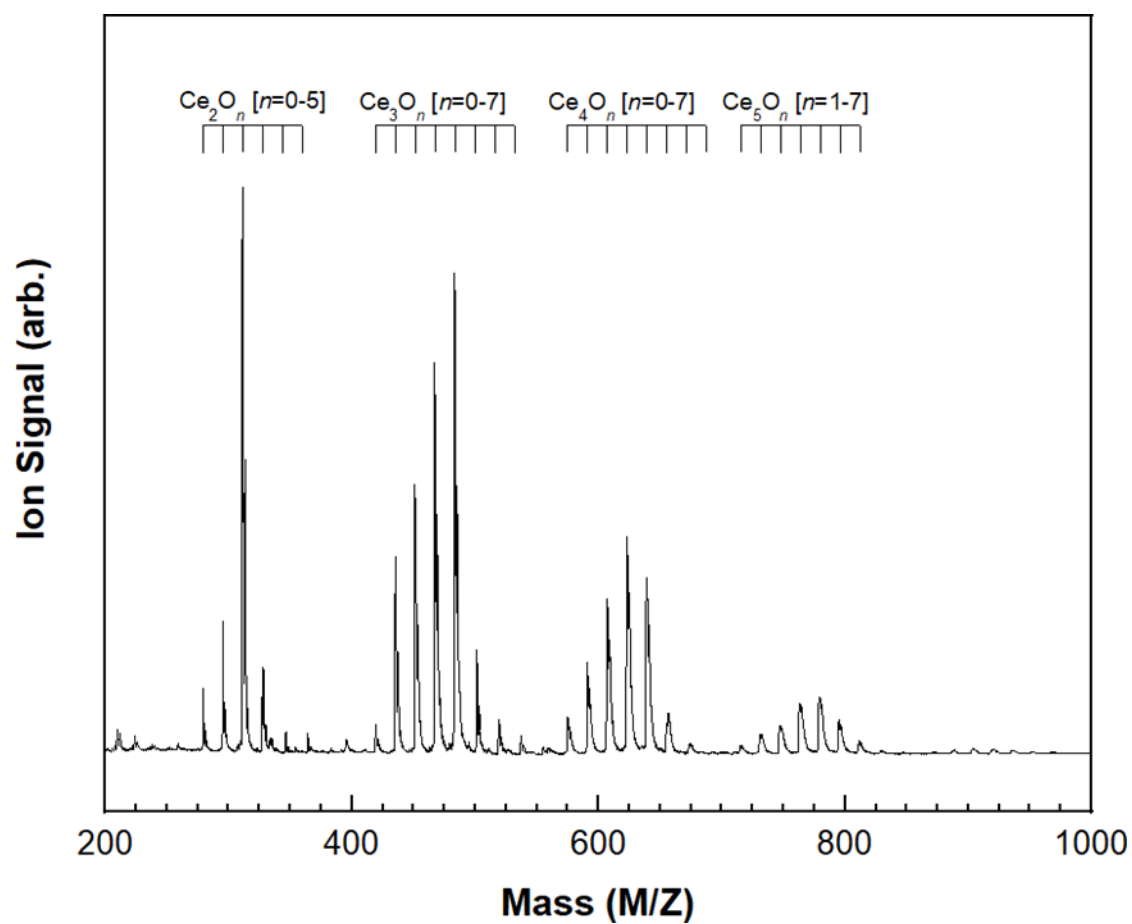

**Figure S2:** Mass spectrum of  $\text{Ce}_m\text{O}_n^+$  clusters recorded following photoionization at 213 nm (5.82 eV). The  $\text{Ce}_m\text{O}_n$  ion peaks are labelled with ladders.

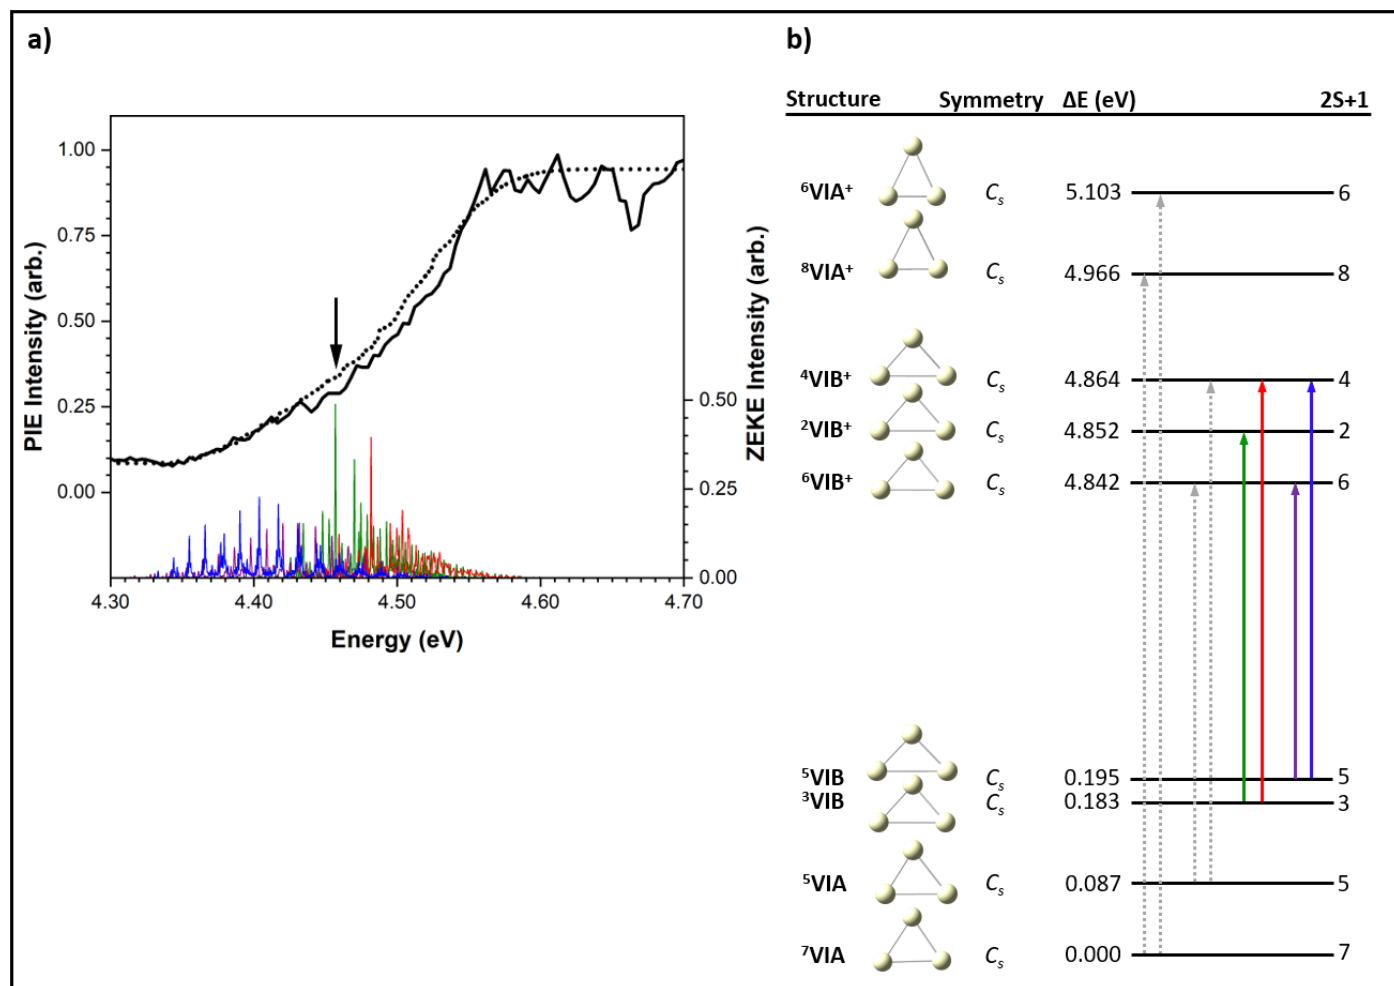

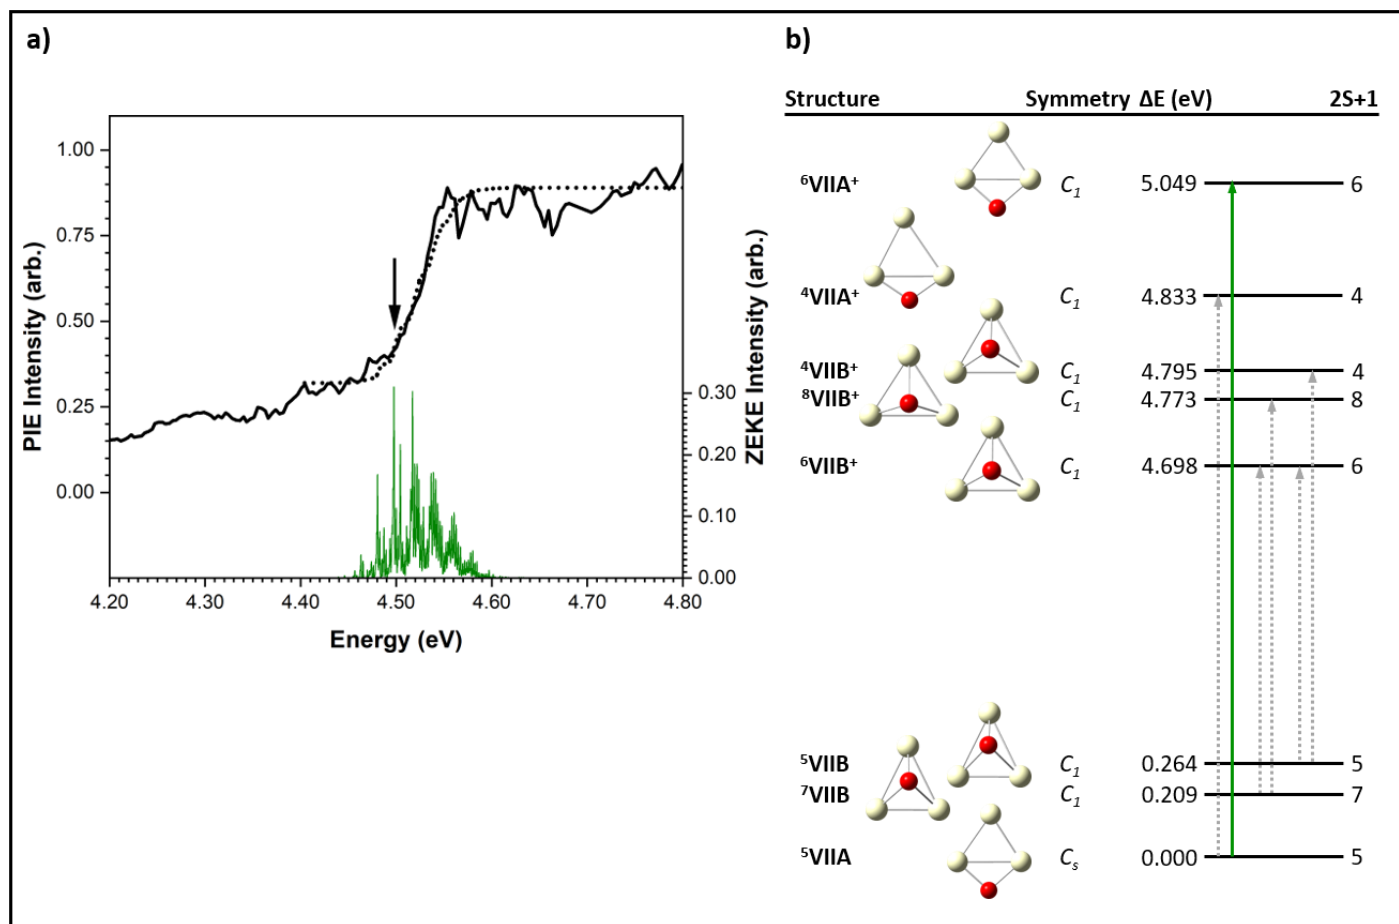

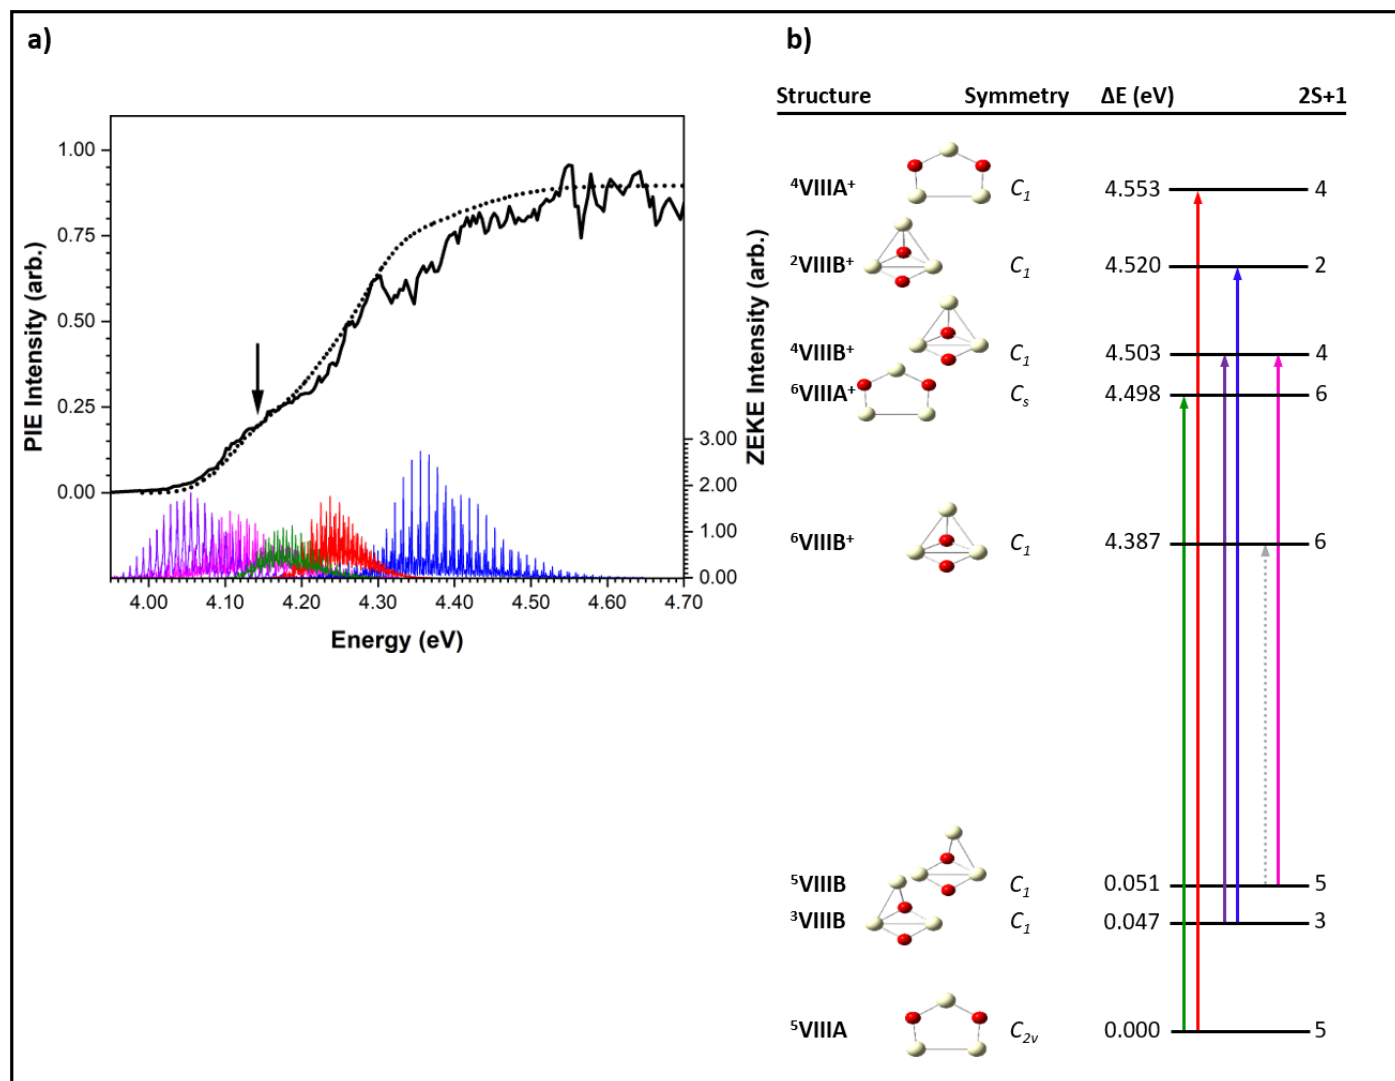

**Figure S5: a).** PIE spectrum for the  $\text{Ce}_3\text{O}_2$  cluster. Experimentally recorded and calculated PIE spectra are shown as solid and dotted black lines, respectively. Calculated ZEKE spectra for underlying ionization transitions are shown below the PIE spectrum in green, red, violet, blue and magenta. The downward arrow indicates the adiabatic IE, the lowest energy origin transition. **b).** Calculated  $\text{Ce}_3\text{O}_3$  structures (Ce is white and O is red) and ionization processes. Ionization transitions are shown as coloured arrows which correspond to their respective ZEKE spectra. Ionization processes not considered to contribute to the PIE spectrum – due to weak FC overlap - are shown as dotted grey arrows.

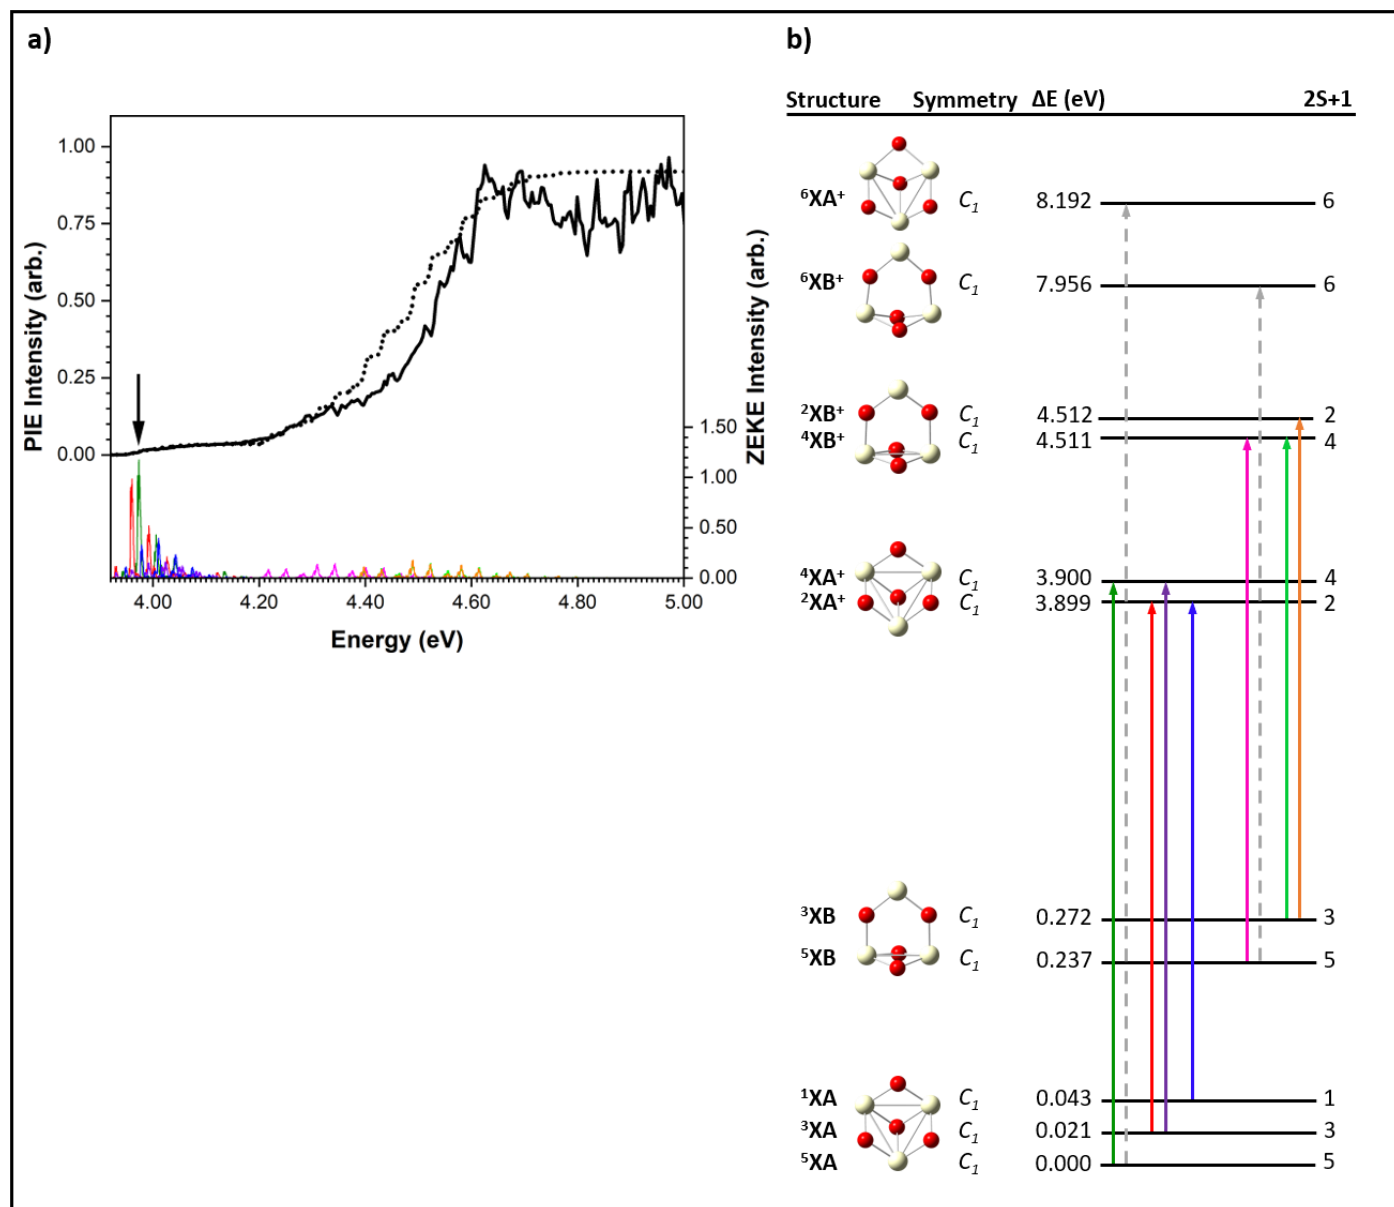

**Figure S6: a).** PIE spectrum for the  $\text{Ce}_3\text{O}_4$  cluster. Experimentally recorded and calculated PIE spectra are shown as solid and dotted black lines, respectively. Calculated ZEKE spectra for the underlying ionization transitions are shown below the PIE spectrum in green, red, violet, blue, magenta, lime and orange. The downward arrow indicates the adiabatic IE, the lowest energy origin transition. **b).** Calculated  $\text{Ce}_3\text{O}_4$  structures (Ce is white and O is red) and ionization processes. Ionization transitions are shown as coloured arrows which correspond to their respective ZEKE spectra. Ionization processes not considered to contribute to the PIE spectrum – due to high ionization energies – are shown as dashed grey arrows.

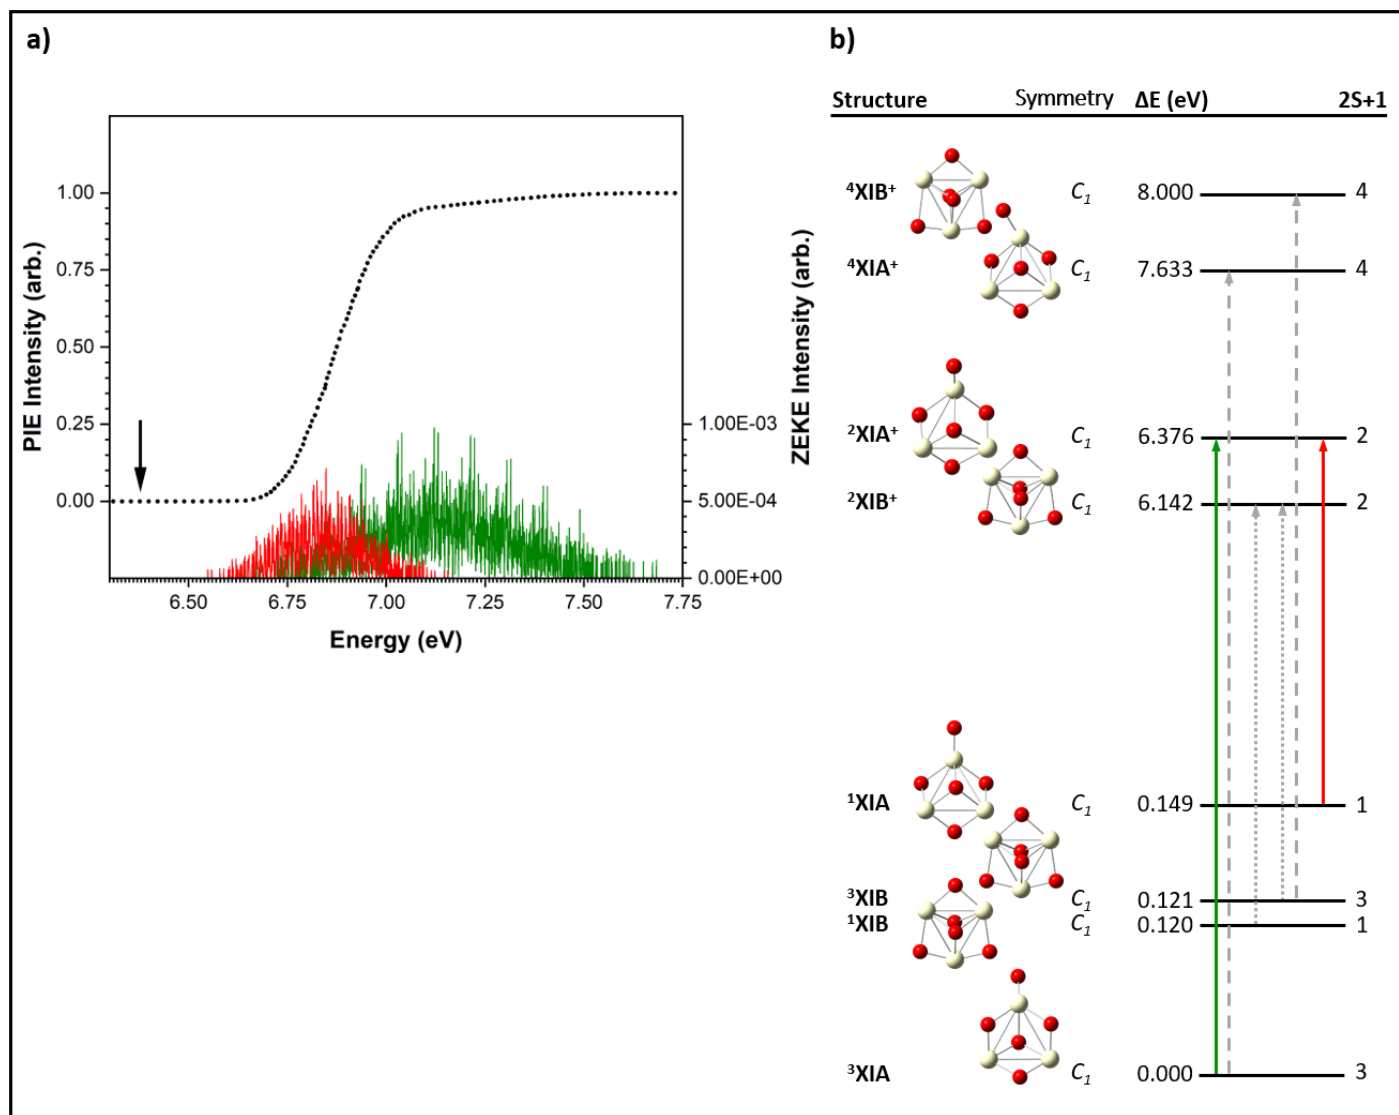



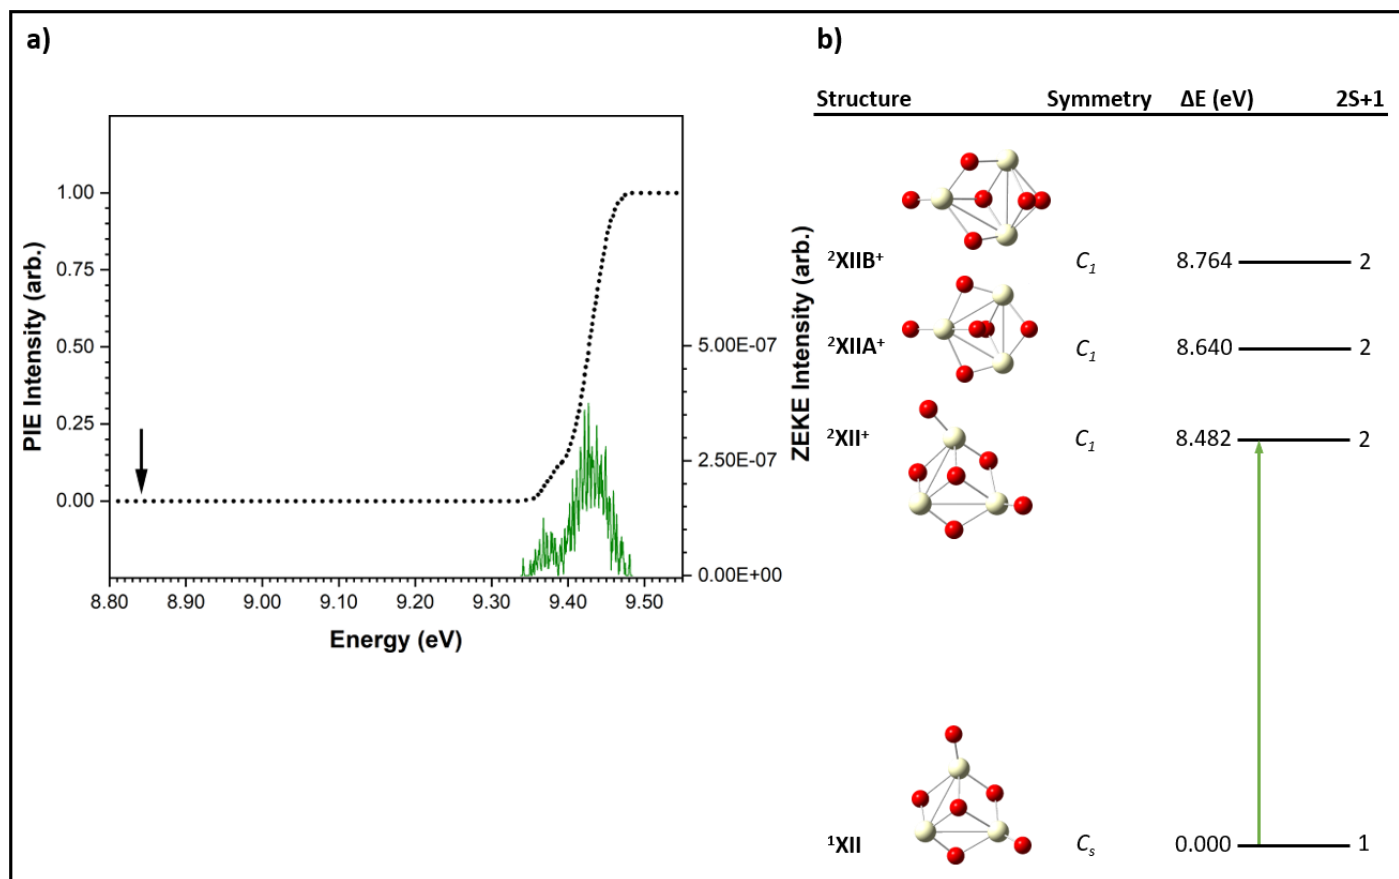

**Figure S8:** **a).** PIE spectrum for the  $Ce_3O_6$  cluster. The calculated PIE spectrum is shown as a dotted black line. The calculated ZEKE spectrum for the underlying ionization transition is shown below the PIE spectrum in green. The downward arrow indicates the calculated adiabatic IE, the lowest energy origin transition. **b).** Calculated  $Ce_3O_6$  structures (Ce is white and O is red) and ionization processes. Ionization transitions are shown as coloured arrows which correspond to their respective ZEKE spectra. The  $^2XIIA^+$  and  $^2XIIB^+$  structures are shown for completeness only.

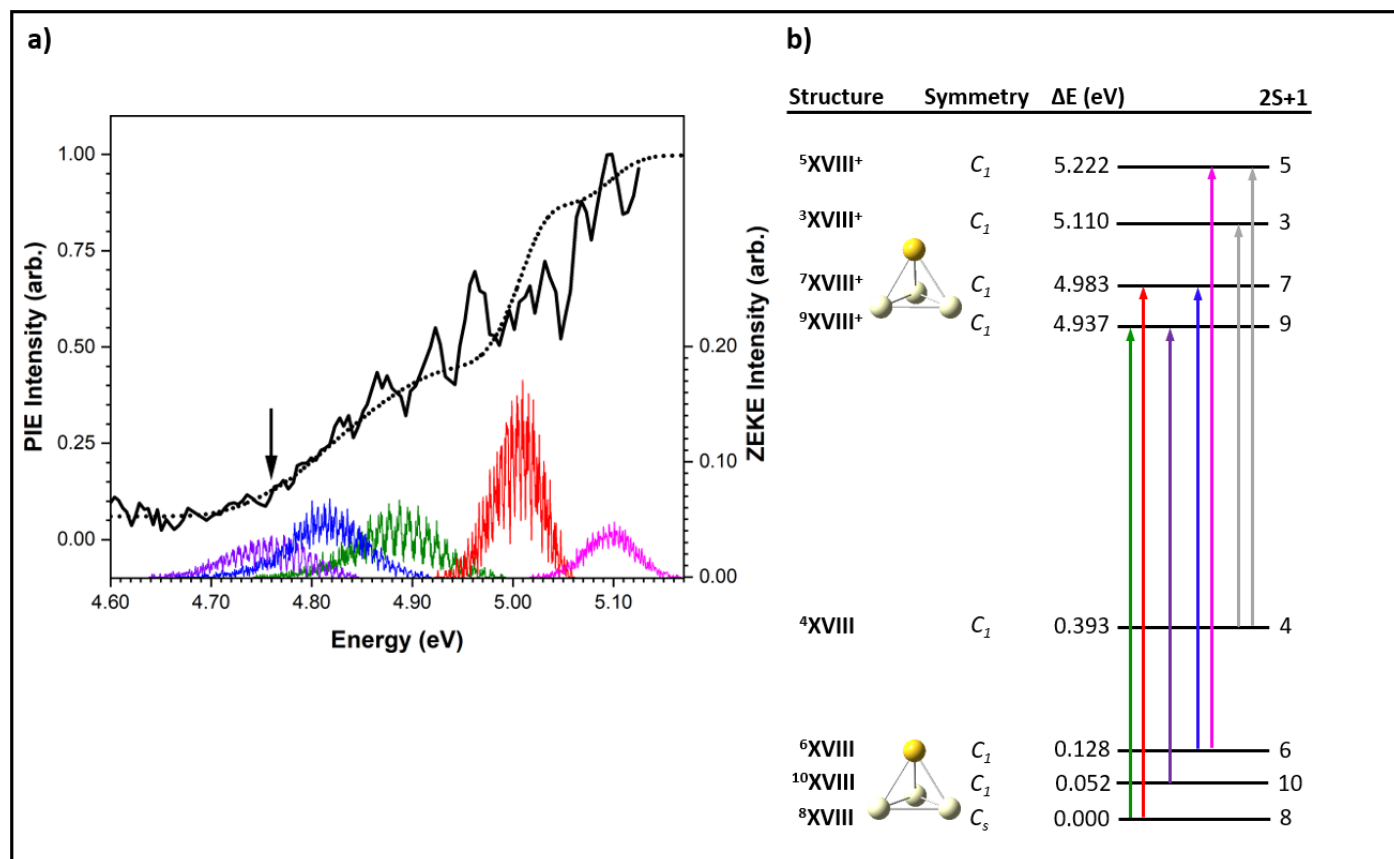

**Figure S9: a).** PIE spectrum for the AuCe<sub>3</sub> cluster. Experimentally recorded and calculated PIE spectra are shown as solid and dotted black lines, respectively. Calculated ZEKE spectra for underlying ionization transitions are shown below the PIE spectra in green, red, purple, blue and magenta. The downward arrow indicates the adiabatic IE, the lowest energy origin transition. **b).** Calculated AuCe<sub>3</sub> structures (Au is yellow and Ce is white) and ionization processes. Ionization transitions are shown as coloured arrows which correspond to their respective ZEKE spectra. Ionization processes not considered to contribute to the PIE spectrum – due to energetically unfavourable neutral species - are shown as solid grey arrows.

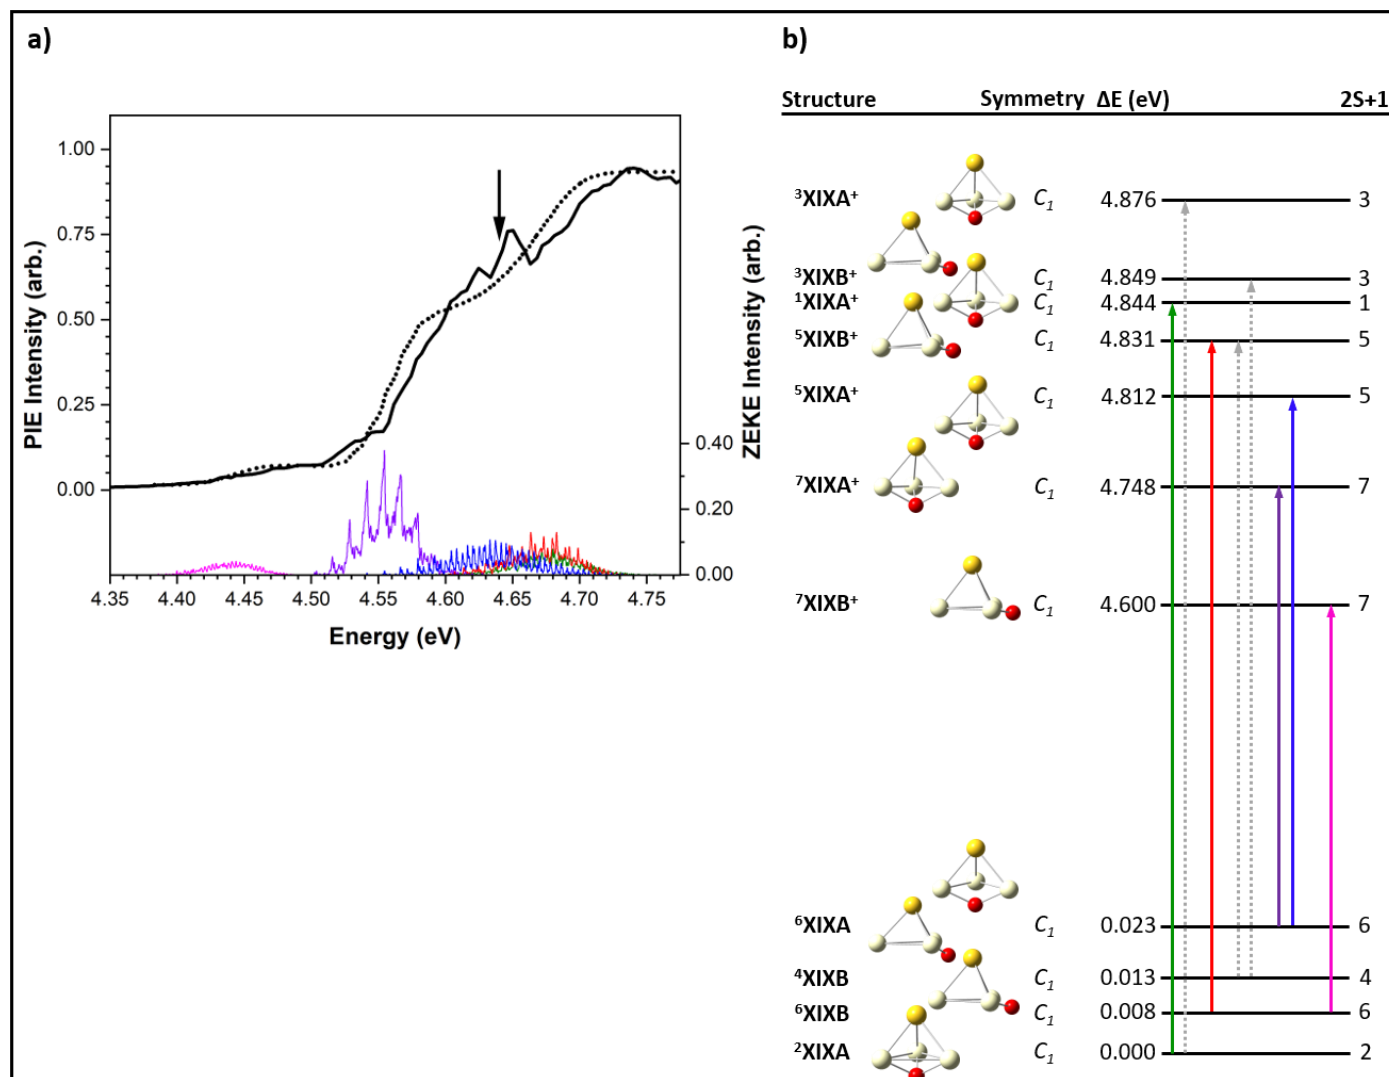

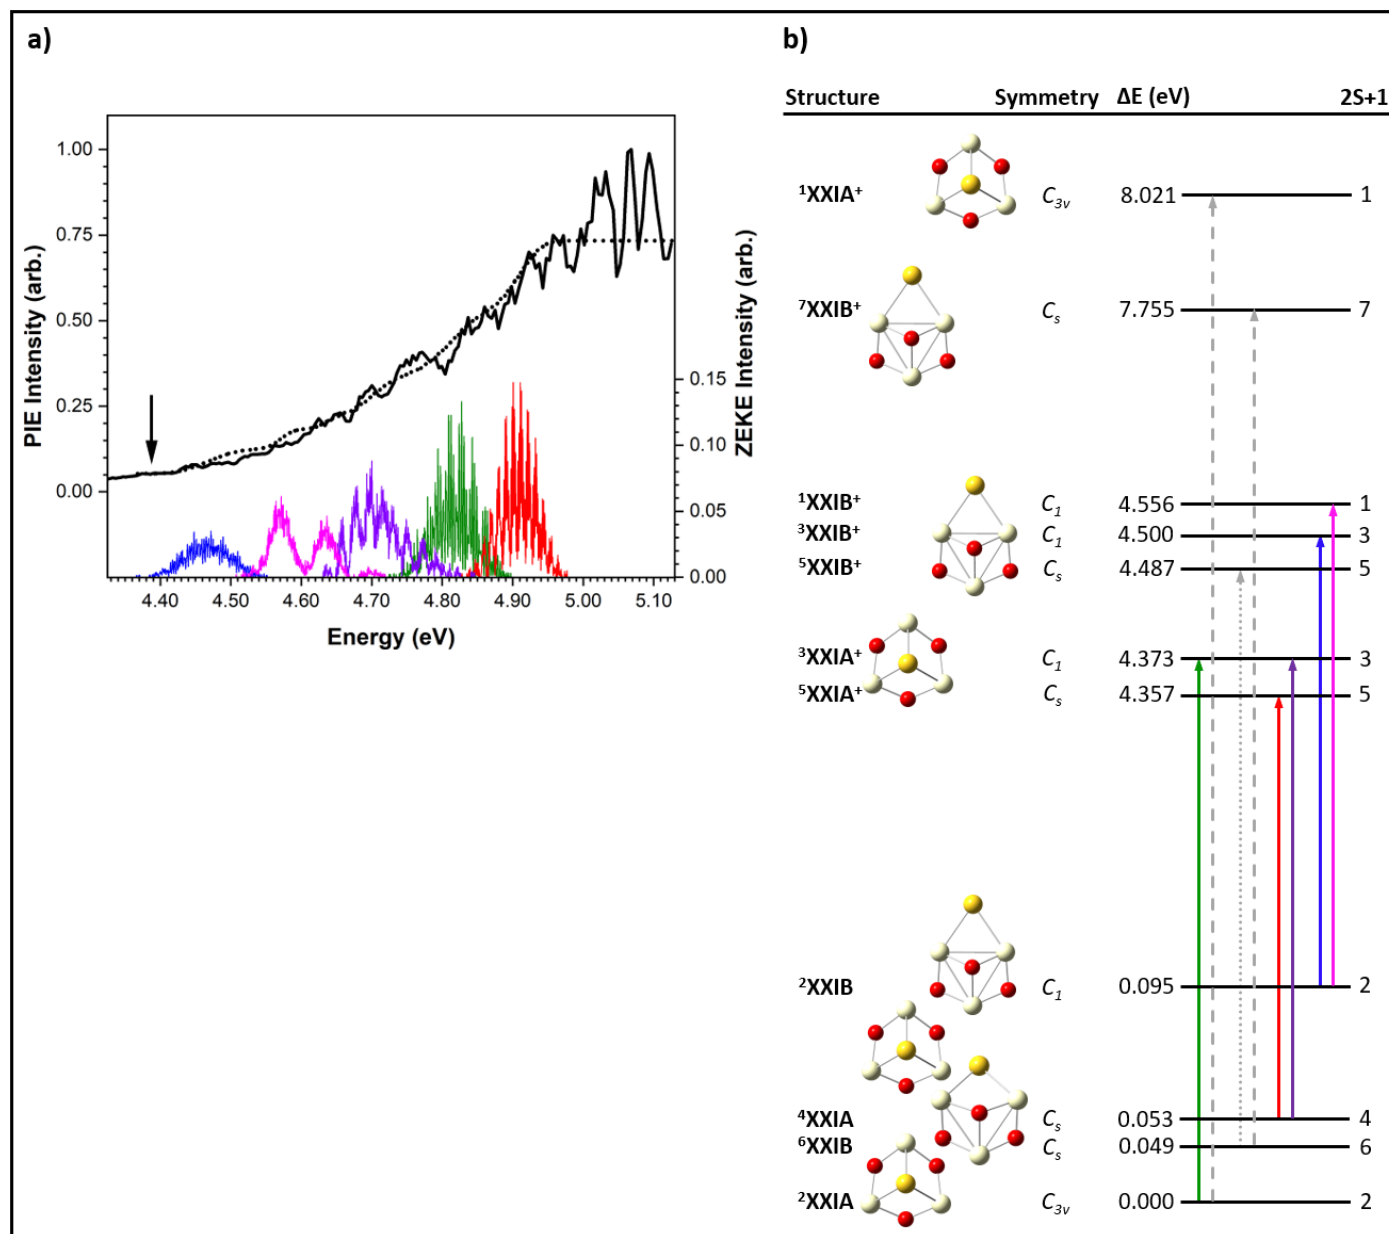

**Figure S11: a).** PIE spectrum for the  $\text{AuCe}_3\text{O}_3$  cluster. Experimentally recorded and calculated PIE spectra are shown as solid and dotted black lines, respectively. Calculated ZEKE spectra for underlying ionization transitions are shown below the PIE spectra in green, red, violet, blue and magenta. The downward arrow indicates the adiabatic IE, the lowest energy origin transition. **b).** Calculated  $\text{AuCe}_3\text{O}_3$  structures (Au is yellow, Ce is white and O is red) and ionization processes. Ionization transitions are shown as coloured arrows which correspond to their respective ZEKE spectra. Ionization processes not considered to contribute to the PIE spectrum – due to high ionization energies and weak FC overlap - are shown as dashed grey arrows and dotted grey arrows, respectively.

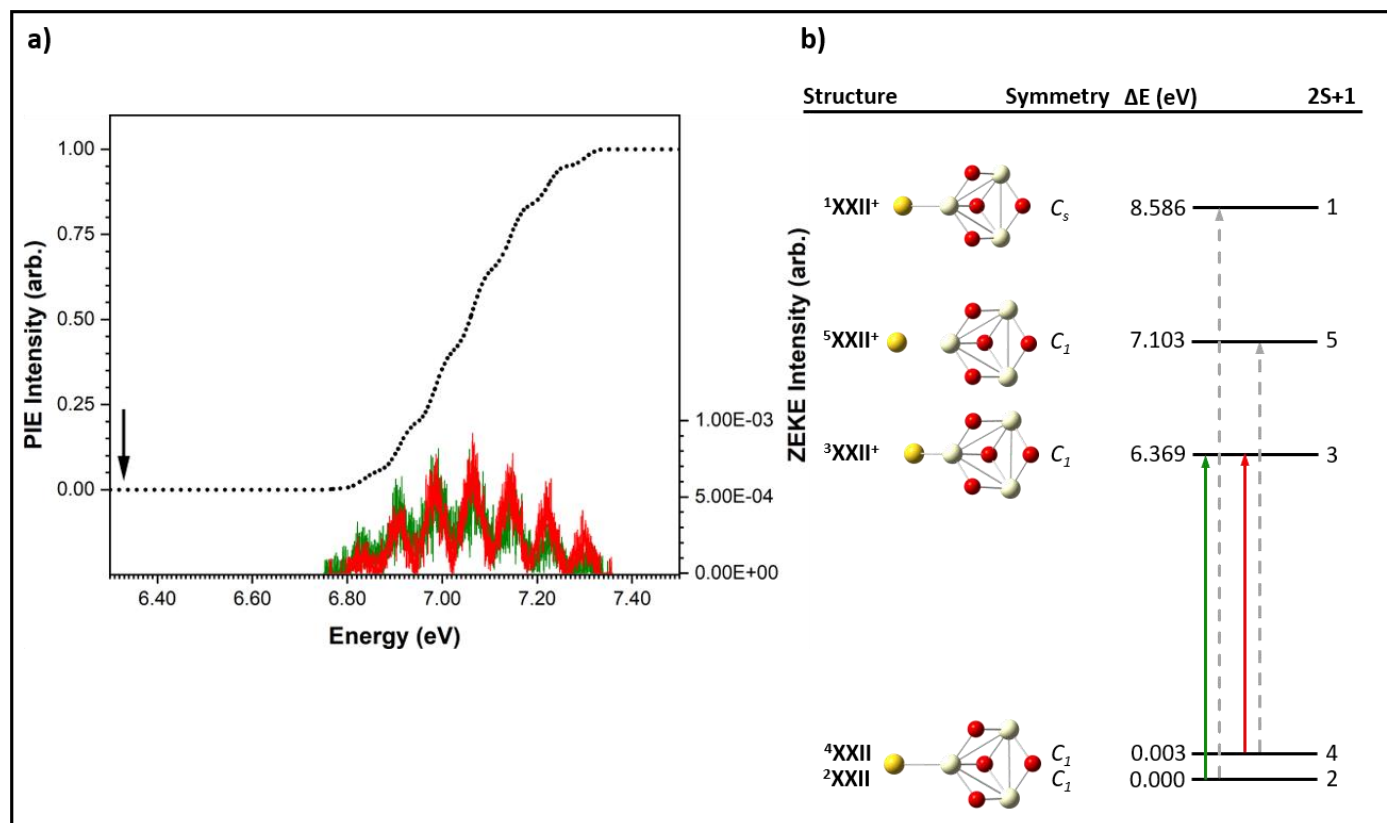

**Figure S12: a).** PIE spectrum for the AuCe<sub>3</sub>O<sub>4</sub> cluster. The calculated PIE spectrum is shown as a dotted black line. Calculated ZEKE spectra for underlying ionization transitions are shown below the PIE spectra in green and red. The downward arrow indicates the calculated adiabatic IE, the lowest energy origin transition. **b).** Calculated AuCe<sub>3</sub>O<sub>4</sub> structures (Au is yellow, Ce is white and O is red) and ionization processes. Ionization transitions are shown as coloured arrows which correspond to their respective ZEKE spectra. Ionization processes not considered to contribute to the PIE spectrum – due to high ionization energies - are shown as dashed grey arrows.

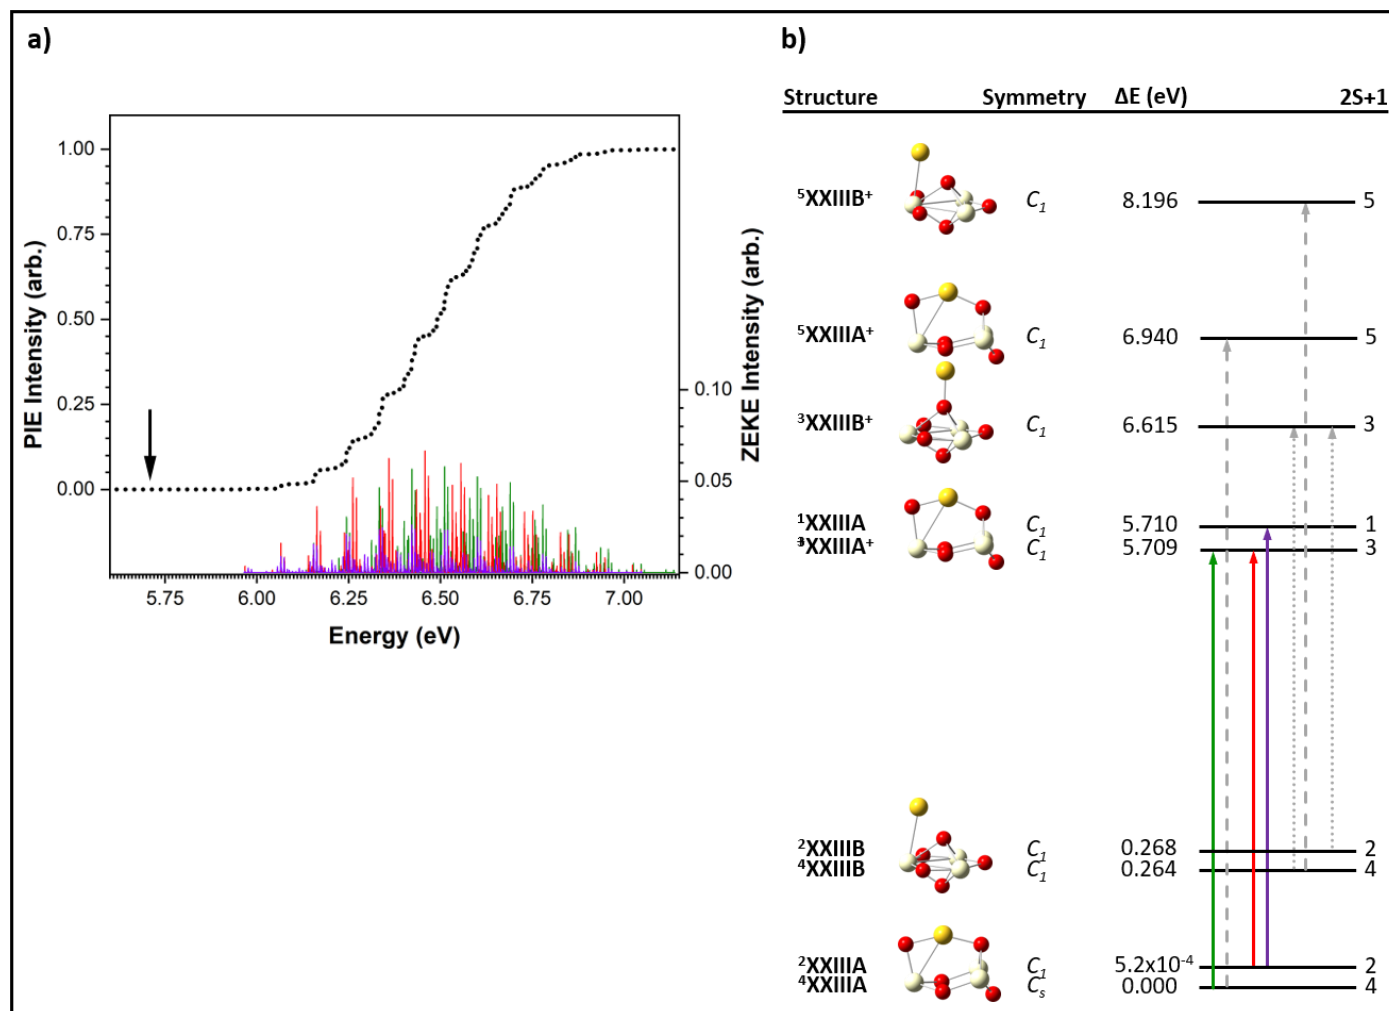

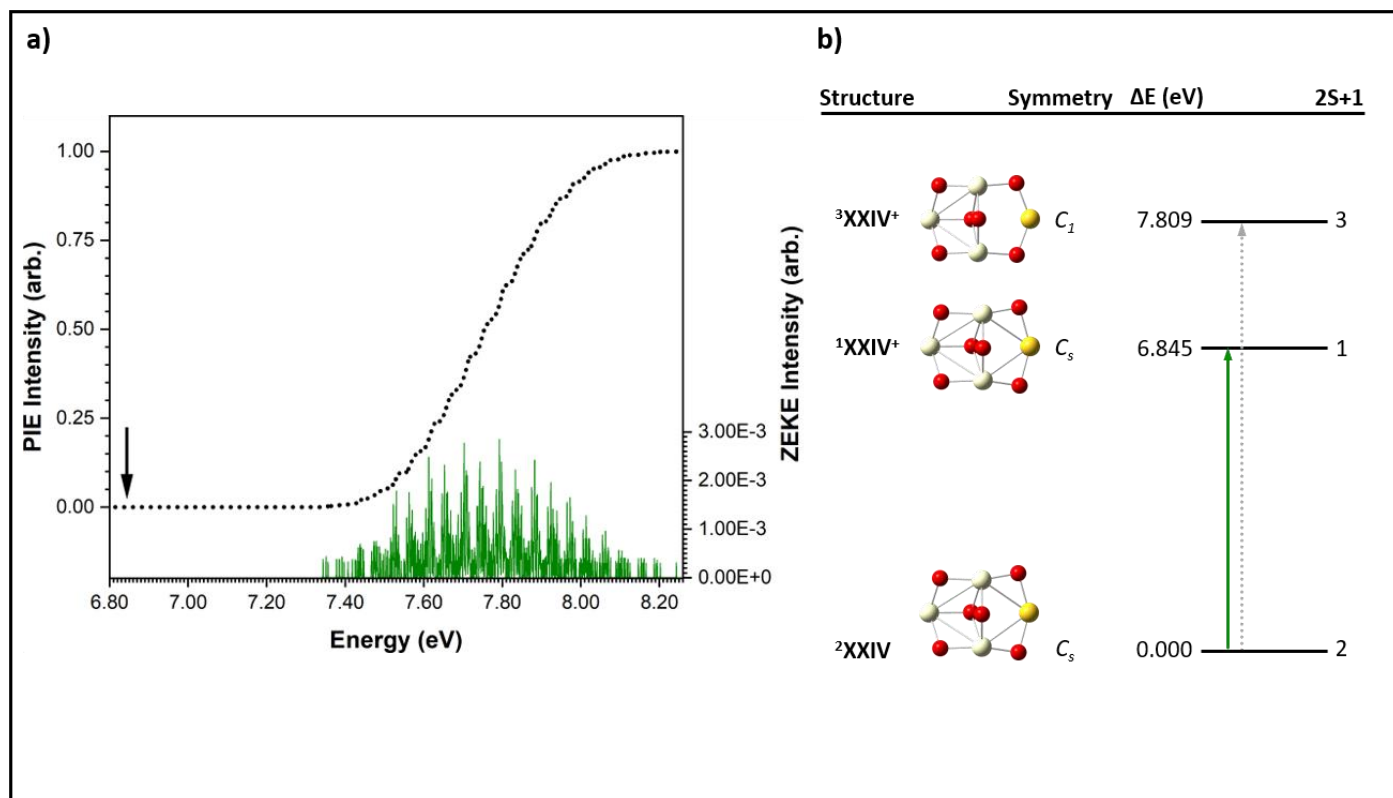

**Figure S14: a).** PIE spectrum for the  $\text{AuCe}_3\text{O}_6$  cluster. The calculated PIE spectrum is shown as a dotted black line. The calculated ZEKE spectrum for the underlying ionization transition is shown below the PIE spectrum in green. The downward arrow indicates the calculated adiabatic IE, the lowest energy origin transition. **b).** Calculated  $\text{AuCe}_3\text{O}_6$  structures (Au is yellow, Ce is white and O is red) and ionization processes. Ionization transitions are shown as coloured arrows which correspond to their respective ZEKE spectra. Ionization processes not considered to contribute to the PIE spectrum – due to weak FC overlap - are shown as dotted grey arrows.

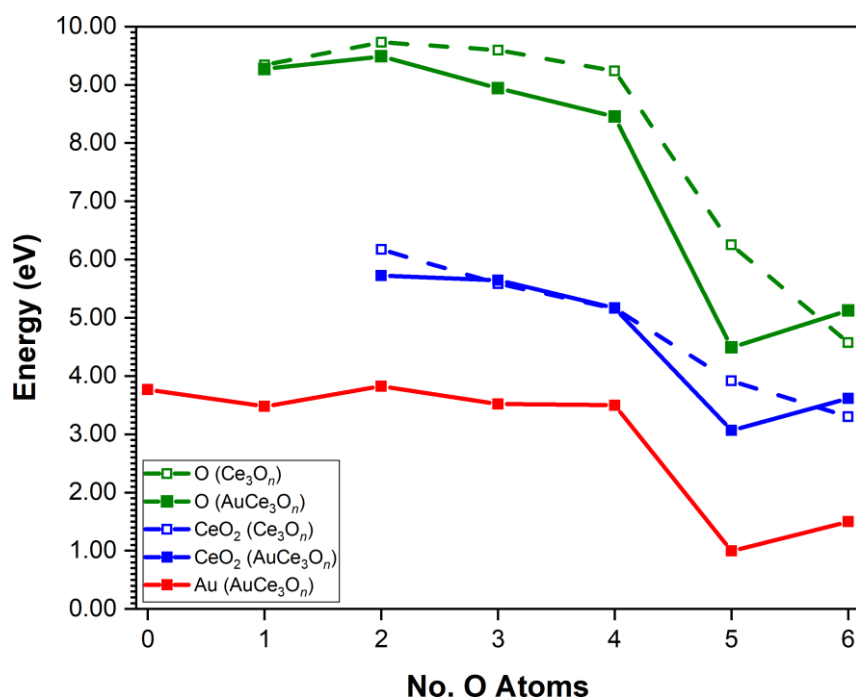

**Figure S15:** Calculated Au (red), O (green) and  $\text{CeO}_2$  (blue) bonding energies for neutral  $\text{Ce}_3\text{O}_n$  (dashed line) and  $\text{AuCe}_3\text{O}_n$  (solid line) clusters.



**Ce<sub>3</sub>**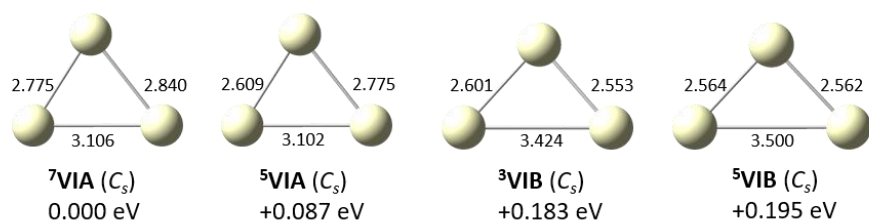**Ce<sub>3</sub><sup>+</sup>**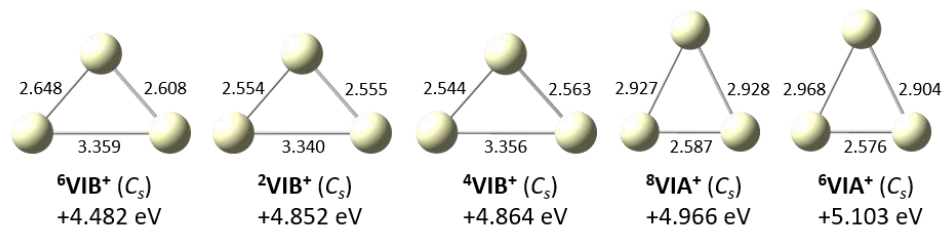

**Figure S16:** Calculated Ce<sub>3</sub> neutral and cationic structures. Bond lengths are presented in Å. Point groups are shown in brackets. Energies are shown relative to the lowest energy neutral structure.

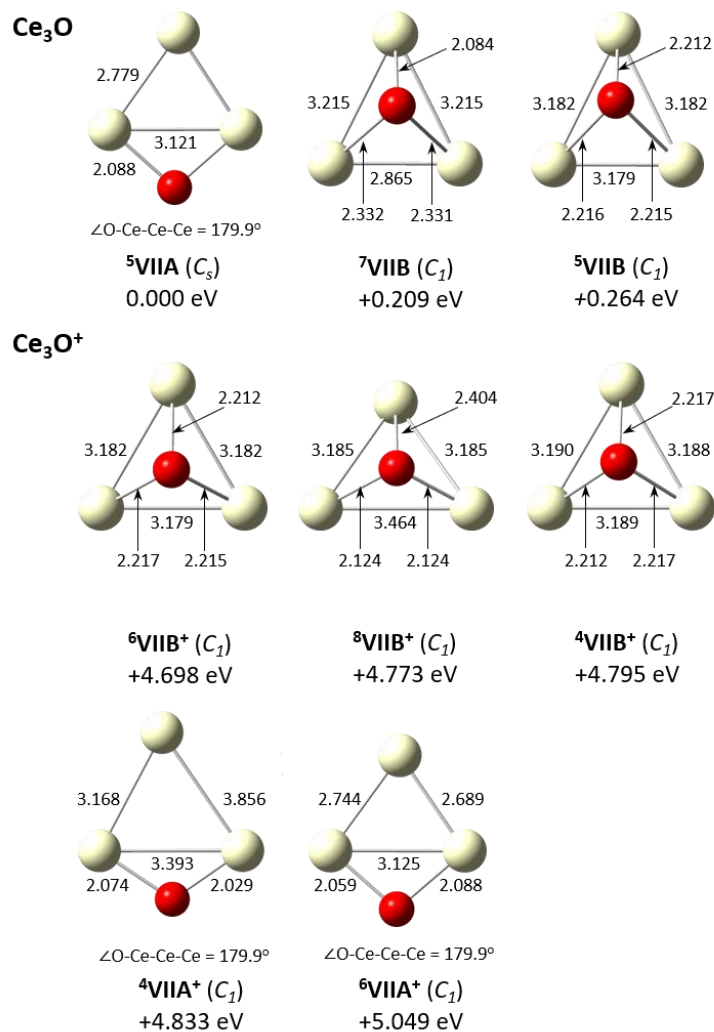

**Figure S17:** Calculated Ce<sub>3</sub>O neutral and cationic structures. Bond lengths are presented in Å. Point groups are shown in brackets. Energies are shown relative to the lowest energy neutral structure.

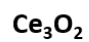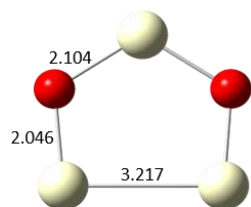

**<sup>5</sup>VIlIA (C<sub>2v</sub>)**  
0.000 eV

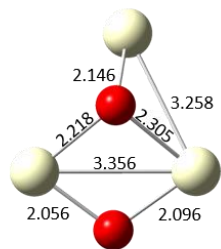

**<sup>3</sup>VIlIB (C<sub>1</sub>)**  
+0.047 eV

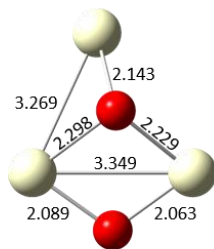

**<sup>5</sup>VIlIB (C<sub>1</sub>)**  
+0.051 eV

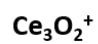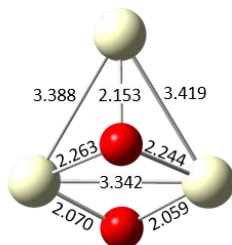

**<sup>6</sup>VIlIB<sup>+</sup> (C<sub>1</sub>)**  
+4.387 eV

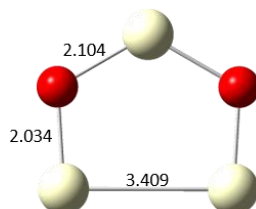

**<sup>6</sup>VIlIA<sup>+</sup> (C<sub>s</sub>)**  
+4.498 eV

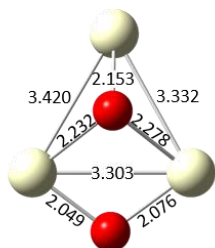

**<sup>4</sup>VIlIB<sup>+</sup> (C<sub>1</sub>)**  
+4.503 eV

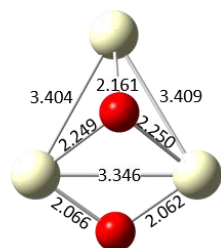

**<sup>2</sup>VIlIB<sup>+</sup> (C<sub>1</sub>)**  
+4.520 eV

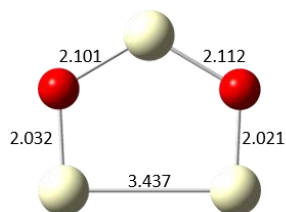

**<sup>4</sup>VIlIA<sup>+</sup> (C<sub>1</sub>)**  
+4.553 eV

**Figure S18:** Calculated Ce<sub>3</sub>O<sub>2</sub> neutral and cationic structures. Bond lengths are presented in Å. Point groups are shown in brackets. Energies are shown relative to the lowest energy neutral structure.

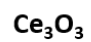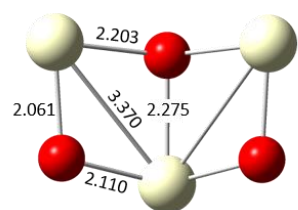

$\angle \text{Ce-O-Ce} = 118.4^\circ$

**<sup>5</sup>IX (C<sub>s</sub>)**  
0.000 eV

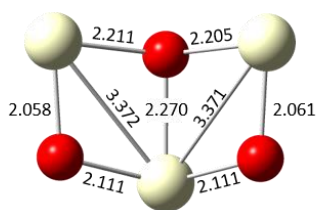

$\angle \text{Ce-O-Ce} = 117.8^\circ$

**<sup>3</sup>IX (C<sub>1</sub>)**  
+0.016 eV

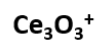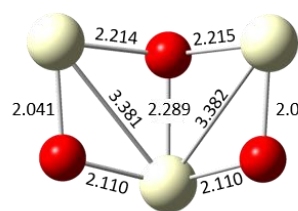

$\angle \text{Ce-O-Ce} = 104.9^\circ$

**<sup>2</sup>IX<sup>+</sup> (C<sub>1</sub>)**  
+4.214 eV

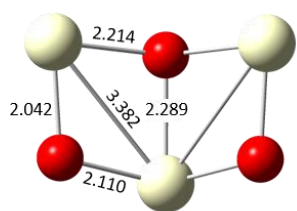

$\angle \text{Ce-O-Ce} = 104.8^\circ$

**<sup>4</sup>IX<sup>+</sup> (C<sub>s</sub>)**  
+4.216 eV

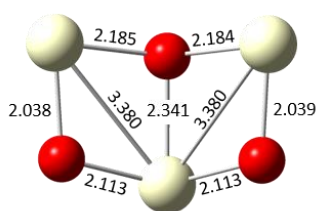

$\angle \text{Ce-O-Ce} = 132.5^\circ$

**<sup>6</sup>IX<sup>+</sup> (C<sub>1</sub>)**  
+4.600 eV

**Figure S19:** Calculated Ce<sub>3</sub>O<sub>3</sub> neutral and cationic structures. Bond lengths are presented in Å. Point groups are shown in brackets. Energies are shown relative to the lowest energy neutral structure.

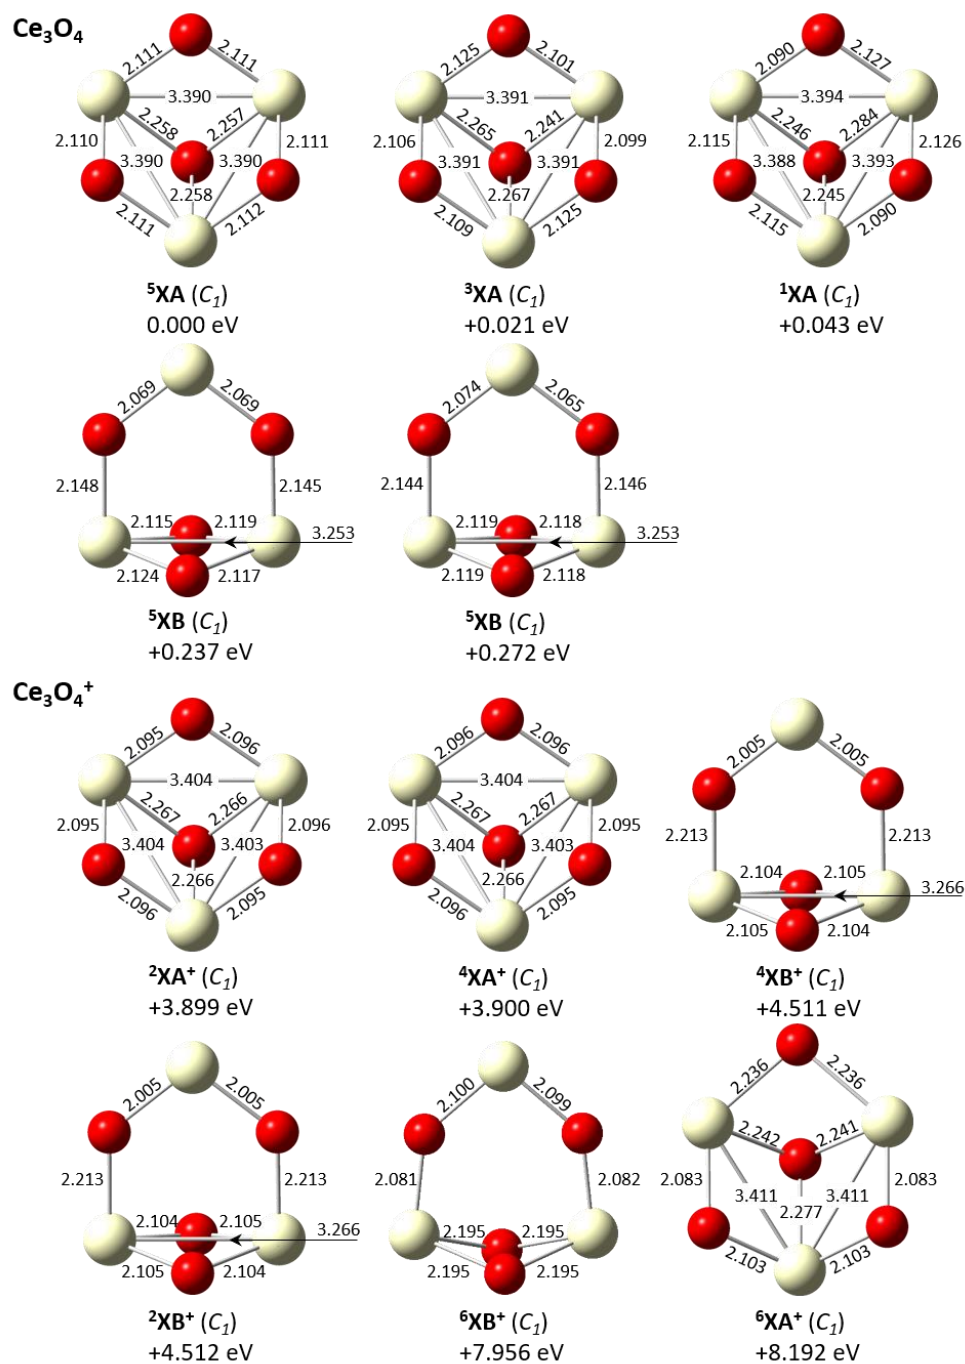

**Figure S20:** Calculated Ce<sub>3</sub>O<sub>4</sub> neutral and cationic structures. Bond lengths are presented in Å. Point groups are shown in brackets. Energies are shown relative to the lowest energy neutral structure.

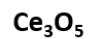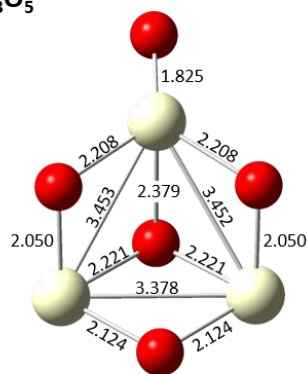

$^3\text{XIA} (C_1)$   
0.000 eV

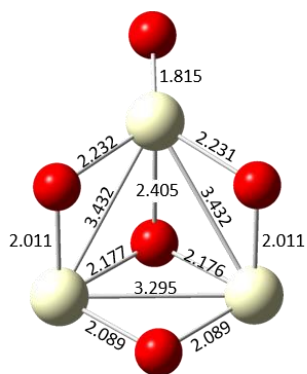

$^1\text{XIA} (C_1)$   
+0.120 eV

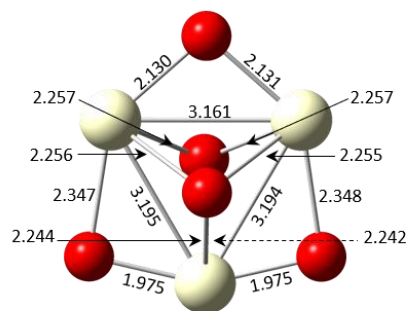

$^3\text{XIB} (C_1)$   
+0.121 eV

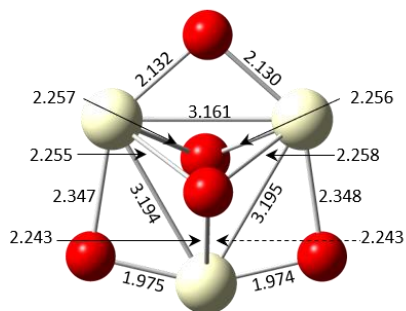

$^1\text{XIB} (C_1)$   
+0.149 eV

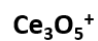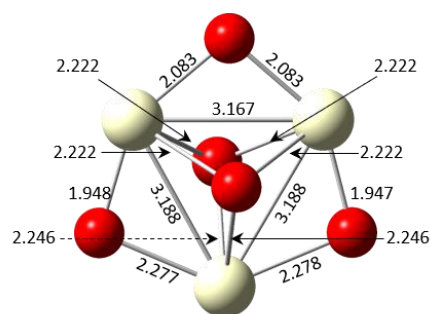

$^2\text{XIB}^+ (C_1)$   
+6.142 eV

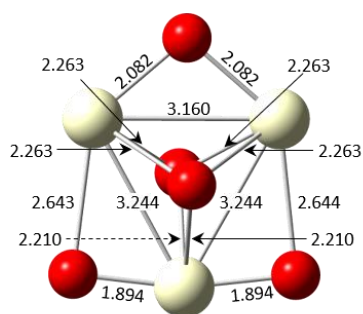

$^4\text{XIB}^+ (C_1)$   
6.376 eV

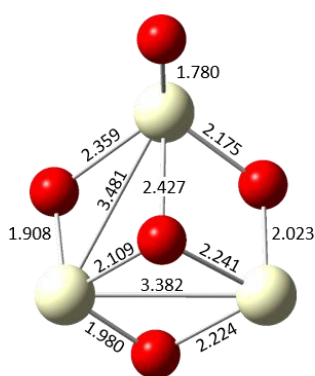

$^2\text{XIA}^+ (C_1)$   
+7.633 eV

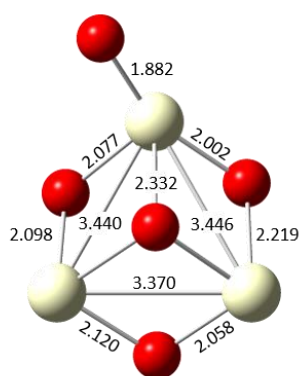

$^4\text{XIA}^+ (C_1)$   
+8.000 eV

**Figure S21:** Calculated  $\text{Ce}_3\text{O}_5$  neutral and cationic structures. Bond lengths are presented in Å. Point groups are shown in brackets. Energies are shown relative to the lowest energy neutral structure.

### Ce<sub>3</sub>O<sub>6</sub>

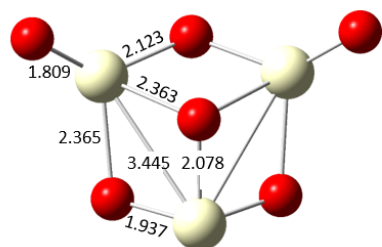

<sup>1</sup>XII (C<sub>s</sub>)  
0.000 eV

### Ce<sub>3</sub>O<sub>6</sub><sup>+</sup>

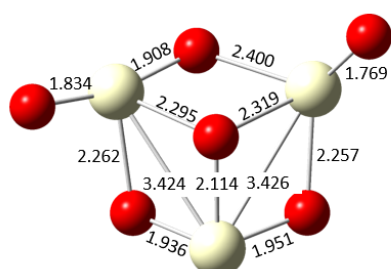

<sup>2</sup>XII<sup>+</sup> (C<sub>1</sub>)  
+8.482 eV

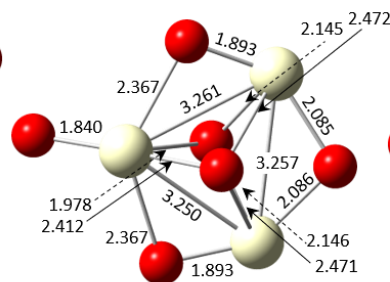

<sup>2</sup>XIIA<sup>+</sup> (C<sub>1</sub>)  
+8.640 eV

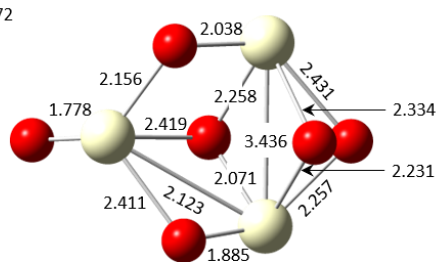

<sup>2</sup>XIIB<sup>+</sup> (C<sub>1</sub>)  
+8.764 eV

**Figure S22:** Calculated Ce<sub>3</sub>O<sub>6</sub> neutral and cationic structures. Bond lengths are presented in Å. Point groups are shown in brackets. Energies are shown relative to the lowest energy neutral structure.

### AuCe<sub>3</sub>

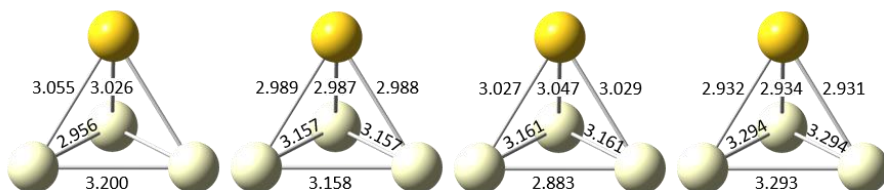

<sup>8</sup>XVIII (C<sub>s</sub>)  
0.000 eV

<sup>10</sup>XVIII (C<sub>1</sub>)  
+0.052 eV

<sup>6</sup>XVIII (C<sub>1</sub>)  
+0.128 eV

<sup>4</sup>XVIII (C<sub>1</sub>)  
+0.393 eV

### AuCe<sub>3</sub><sup>+</sup>

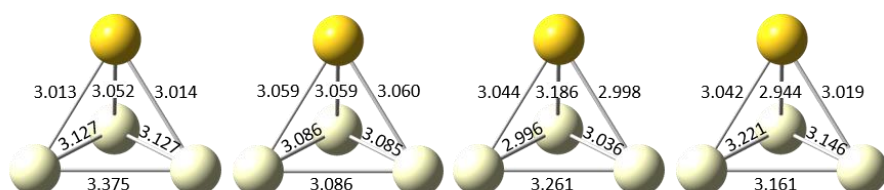

<sup>9</sup>XVIII<sup>+</sup> (C<sub>1</sub>)  
+4.937 eV

<sup>7</sup>XVIII<sup>+</sup> (C<sub>1</sub>)  
+4.983 eV

<sup>3</sup>XVIII<sup>+</sup> (C<sub>1</sub>)  
+5.110 eV

<sup>5</sup>XVIII<sup>+</sup> (C<sub>1</sub>)  
+5.222 eV

**Figure S23:** Calculated AuCe<sub>3</sub> neutral and cationic structures. Bond lengths are presented in Å. Point groups are shown in brackets. Energies are shown relative to the lowest energy neutral structure.

### AuCe<sub>3</sub>O

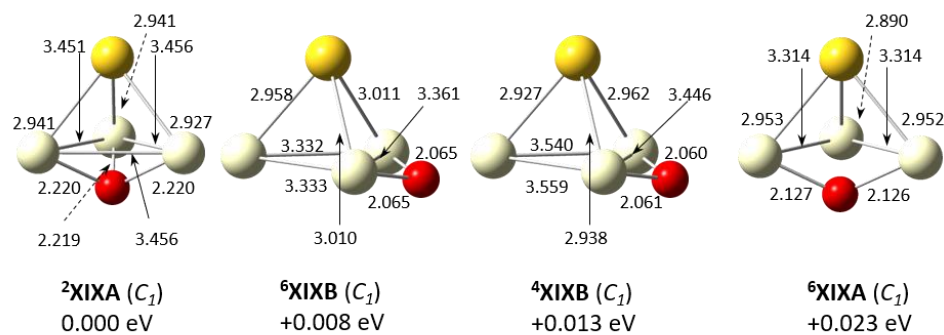

### AuCe<sub>3</sub>O<sup>+</sup>

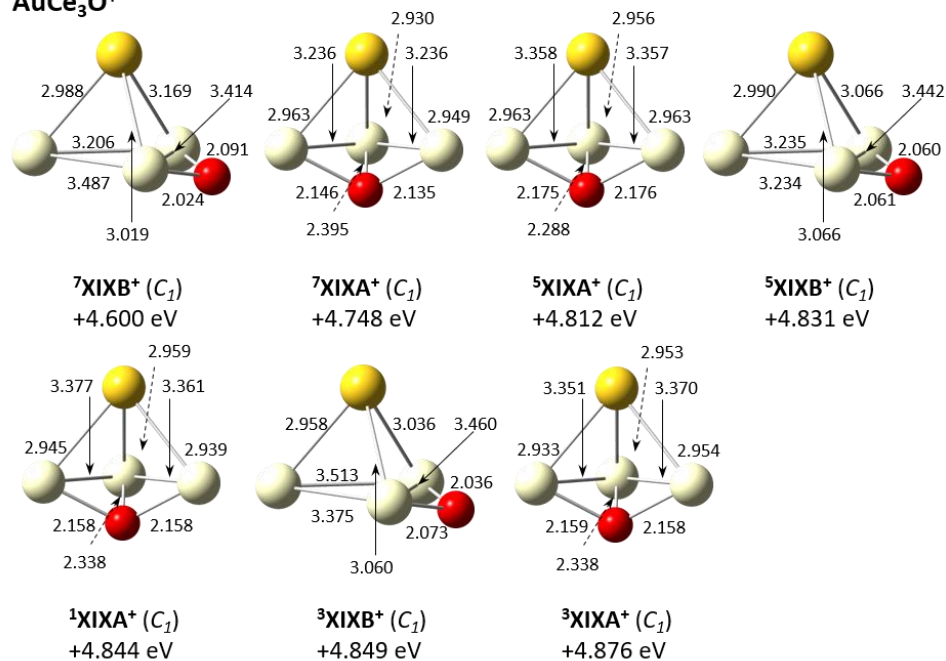

**Figure S24:** Calculated AuCe<sub>3</sub>O neutral and cationic structures. Bond lengths are presented in Å. Point groups are shown in brackets. Energies are shown relative to the lowest energy neutral structure.



### $\text{AuCe}_3\text{O}_2$

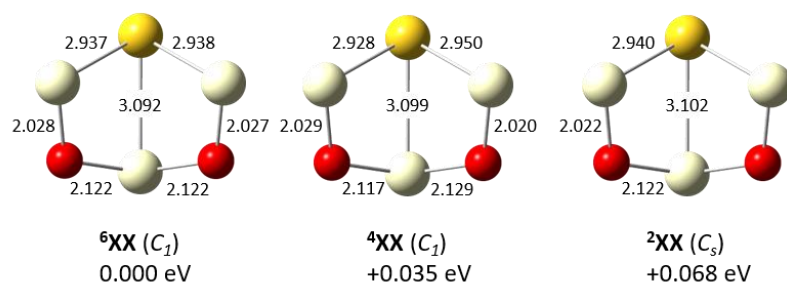

### $\text{AuCe}_3\text{O}_2^+$

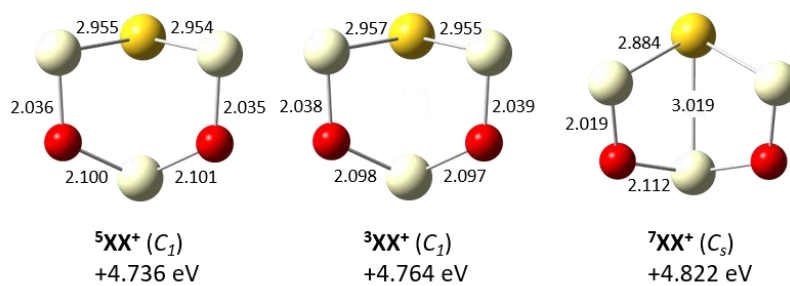

**Figure S25:** Calculated  $\text{AuCe}_3\text{O}_2$  neutral and cationic structures. Bond lengths are presented in Å. Point groups are shown in brackets. Energies are shown relative to the lowest energy neutral structure.

### AuCe<sub>3</sub>O<sub>3</sub>

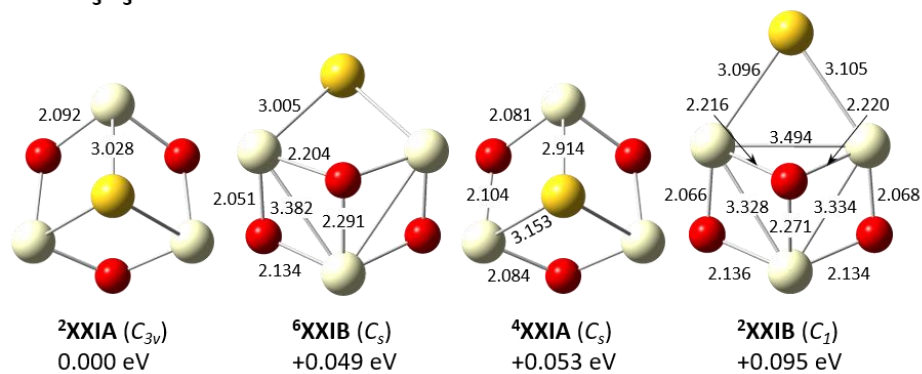

### AuCe<sub>3</sub>O<sub>3</sub><sup>+</sup>

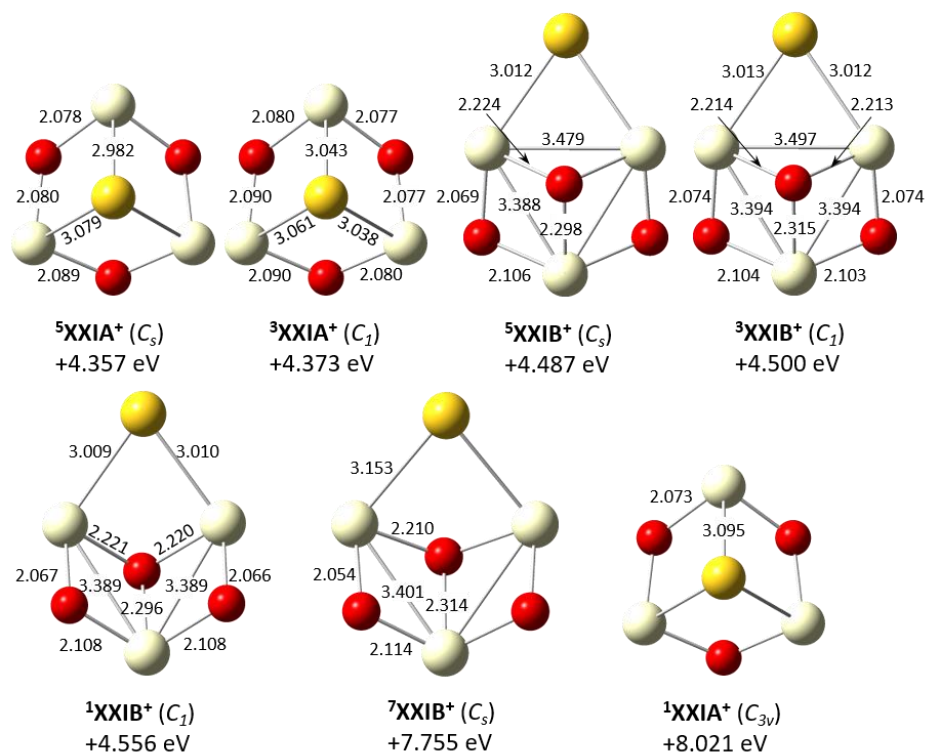

**Figure S26:** Calculated AuCe<sub>3</sub>O<sub>3</sub> neutral and cationic structures. Bond lengths are presented in Å. Point groups are shown in brackets. Energies are shown relative to the lowest energy neutral structure.

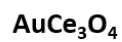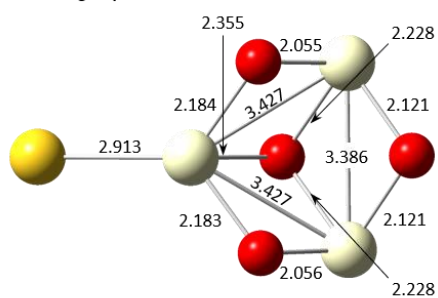

**<sup>2</sup>XXII (C<sub>1</sub>)**  
0.000 eV

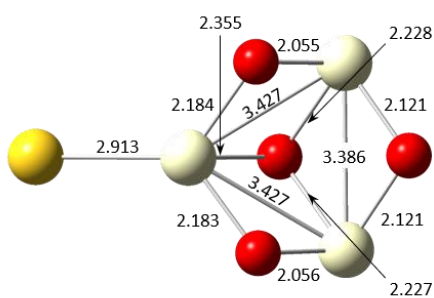

**<sup>4</sup>XXII (C<sub>1</sub>)**  
+0.003 eV

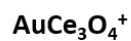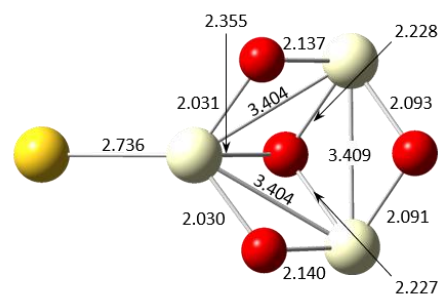

**<sup>3</sup>XXII<sup>+</sup> (C<sub>1</sub>)**  
+6.369 eV

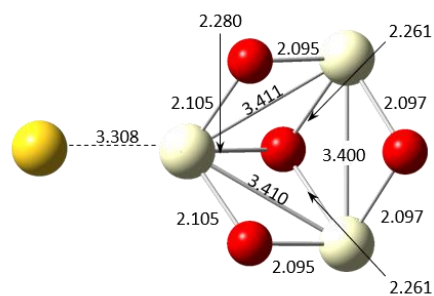

**<sup>5</sup>XXII<sup>+</sup> (C<sub>1</sub>)**  
+7.103 eV

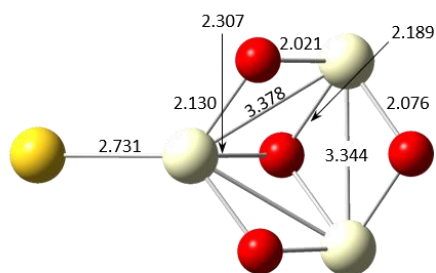

**<sup>1</sup>XXII<sup>+</sup> (C<sub>s</sub>)**  
+8.586 eV

**Figure S27:** Calculated AuCe<sub>3</sub>O<sub>4</sub> neutral and cationic structures. Bond lengths are presented in Å. Point groups are shown in brackets. Energies are shown relative to the lowest energy neutral structure.

**AuCe<sub>3</sub>O<sub>5</sub>**

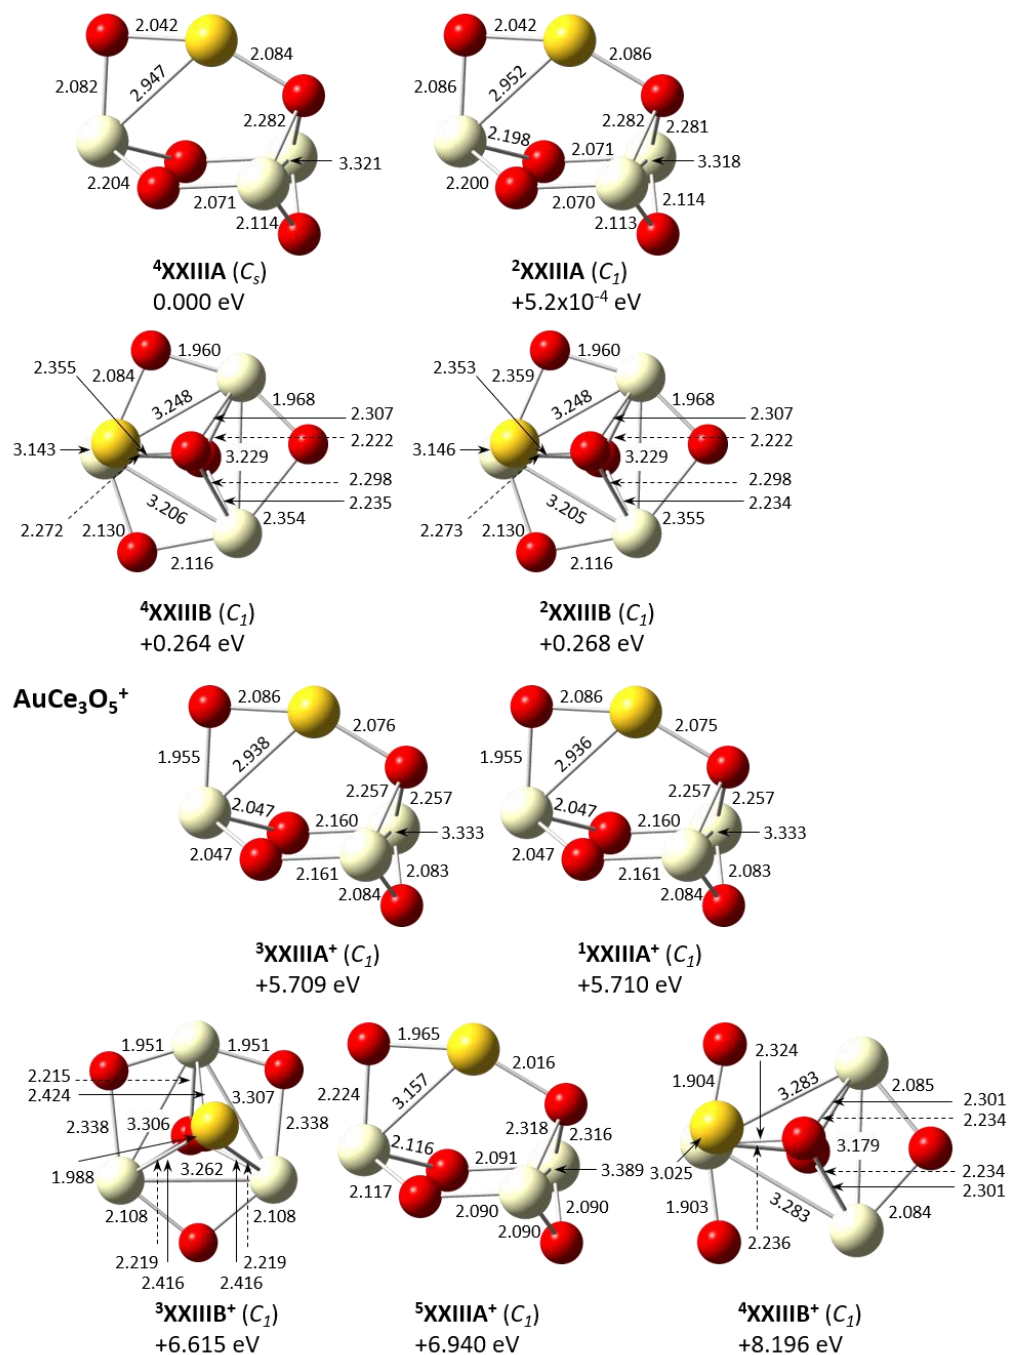

**Figure S28:** Calculated AuCe<sub>3</sub>O<sub>5</sub> neutral and cationic structures. Bond lengths are presented in Å. Point groups are shown in brackets. Energies are shown relative to the lowest energy neutral structure.

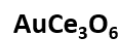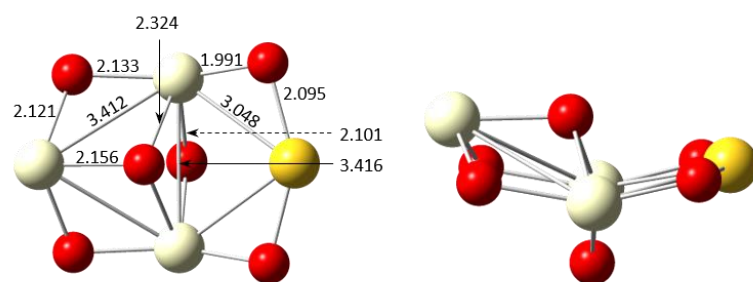

**<sup>2</sup>XXIV (C<sub>s</sub>)**  
0.000 eV

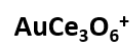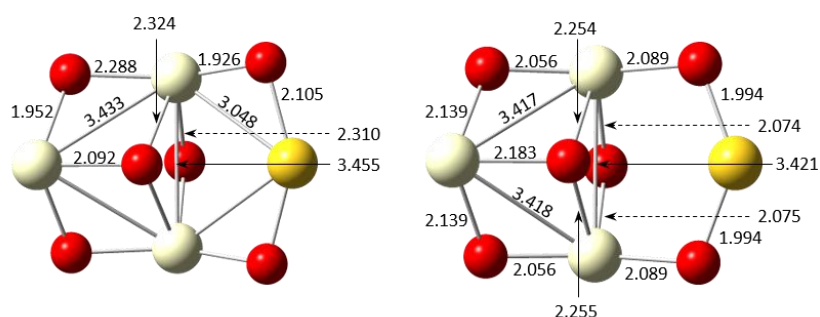

**<sup>1</sup>XXIV<sup>+</sup> (C<sub>s</sub>)**  
+6.845 eV

**<sup>3</sup>XXIV<sup>+</sup> (C<sub>1</sub>)**  
+7.809 eV

**Figure S29:** Calculated AuCe<sub>3</sub>O<sub>6</sub> neutral and cationic structures. Bond lengths are presented in Å. Point groups are shown in brackets. Energies are shown relative to the lowest energy neutral structure.
